# Supplementary material for: The relationship between dissolution, gas oversaturation and outgassing of solutions determined by Broadband Acoustic Resonance Dissolution Spectroscopy (BARDS)
Source: Royal Society of Chemistry journal article supplement (doi:10.1039/c3an36838f), 2013-01-01
Supplement: c3an36838f.pdf [file c3an36838f.pdf]

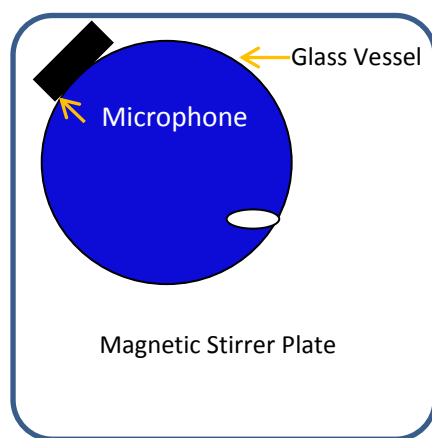

Figure 1: Schematic diagram of BARDS spectrometer

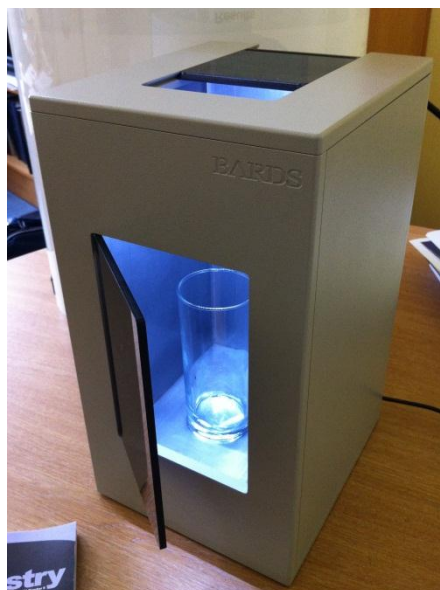

Figure 2: Picture of BARDS spectrometer instrument
